# Supplementary material for: Genetic analysis of complex traits in the emerging Collaborative Cross
Source: HighWire-hosted journal article supplement (doi:10.1101/gr.111310.110), 2011-03-15
Supplement: Supp_Table_1.pdf [file Supp_Table_1.pdf]

Supplementary Table 1. Study Arms of the pre-CC experiment.

| Study Arm                  | Phenotypes<br>(Location)                                                                                                                                                                               | Genotyping<br>Platform                 | # of unique RI<br>Lines |
|----------------------------|--------------------------------------------------------------------------------------------------------------------------------------------------------------------------------------------------------|----------------------------------------|-------------------------|
| Metabolism                 | Kidney function, Liver transcriptome (JAX)<br>Metabolism, Exercise, Body composition,<br>Social novelty, Pain perception, Body and<br>organ weights, Immune cell counts (UNC)<br>Immune response (NJH) | Affymetrix<br>Training Array<br>1      | 184                     |
| Allergic Airway<br>Disease | Airway responsiveness, Hematological<br>parameters, Blood cell counts (NHGRI)<br>Immune response (NJH)                                                                                                 | Affymetrix<br>Training<br>Arrays 1 & 2 | 161                     |
| Influenza                  | Weight loss, Viral titer, Clinical score, Lung<br>histology (UNC)                                                                                                                                      | Affymetrix<br>Training Array<br>1      | 155                     |
| SARS                       | Weight loss, Viral titer, Clinical score, Lung<br>histology (UNC)                                                                                                                                      | Affymetrix<br>Mouse<br>Diversity Array | 138                     |
